# Supplementary material
Source: publisher figshare collection journal article supplement (https://adisjournals.figshare.com/ndownloader/files/36509106)
Supplement: Supplementary file 1 [file 36509106]

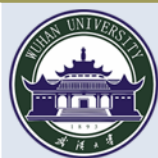

## Application of Machine Learning for Clinical Subphenotype Identification in Sepsis

## A MACHINE LEARNING-BASED, CLUSTER ANALYSIS

## Question

Can machine learning algorithms be applied to identify possible sepsis subphenotypes using routinely available clinical data?

## Database and population

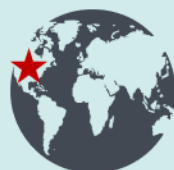

MIMIC-IV  
2008-2019

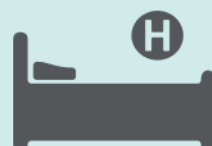

Sepsis  
N = 8817

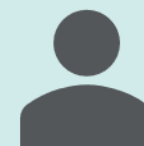

Age: 66.8 years  
Female: 38.1%

## Methods

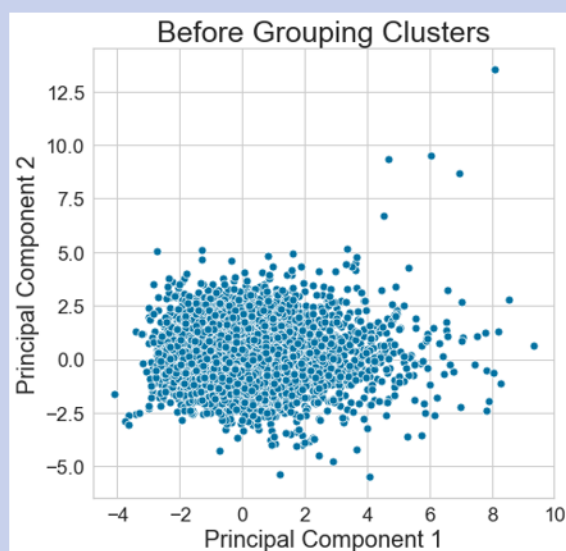

## Cluster analysis

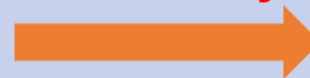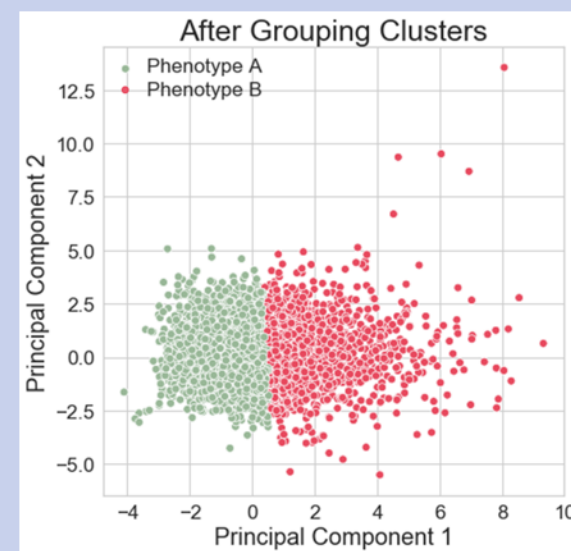

## Results

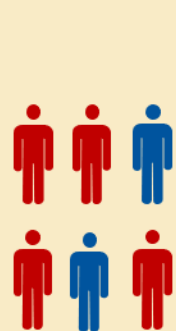

Phenotype A  
(N = 7094)

Phenotype B  
(N = 1723)

In-hospital mortality

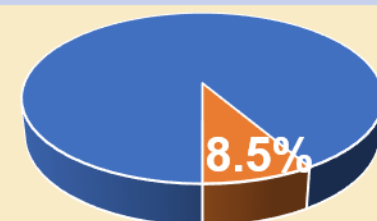

Adjusted  $P < 0.001$

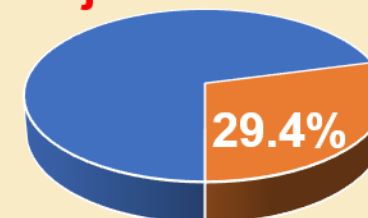

Two sepsis subphenotypes with different clinical outcomes can be rapidly identified using the K-means clustering analysis based on routinely available clinical data. This finding may help clinicians to rapidly and easily identify subphenotype of sepsis at the bedside.

The graphical abstract represents the opinions of the authors. For a full list of declarations, including funding and author disclosure statements, please see the full text online. © The authors, CC-BY-NC 2022
